# Supplementary material for: New members of fluorescent 1,8-naphthyridine-based BF2 compounds: selective binding of BF2 with terminal bidentate N^N^O and N^C^O groups and tunable spectroscopy properties
Source: Royal Society of Chemistry journal article supplement (doi:10.1039/c4dt01735h), 2014-01-01
Supplement: c4dt01735h1.pdf [file c4dt01735h1.pdf]

## Electronic Supporting Information

### **New members of fluorescent 1,8-naphthyridine-based BF<sub>2</sub> compounds: Selective binding of BF<sub>2</sub> with terminal bidentate N<sup>^</sup>N<sup>^</sup>O and N<sup>^</sup>C<sup>^</sup>O groups and tunable spectroscopy properties**

Mei-Ling Du,<sup>a</sup> Cun-Yan Hu,<sup>a</sup> Liu-Fang Wang,<sup>a</sup> Cong Li,<sup>a</sup> Yang-Yang Han,<sup>a</sup> Xin Gan,<sup>a</sup> Yong Chen,<sup>c</sup> Wei-Hua Mu,<sup>a</sup> Michael L. Huang<sup>\*b</sup> and Wen-Fu Fu<sup>\*a,c</sup>

## Experimental procedures

### General Comments

All reactions were performed under nitrogen atmosphere. The solvents used for spectroscopic measurements were HPLC grade. <sup>1</sup>H NMR spectra were recorded on a Bruker 400 (<sup>19</sup>F NMR, 376 MHz) or 500 MHz AVANCE II spectrometer at 298 K. ESI-MS data were obtained with an APEX II Model FT-ICR mass spectrograph. Elemental analyses were performed with an Elementar Vario EL instrument. UV-Vis spectra were obtained using a Hitachi U-3010 spectrophotometer. Corrected emission spectra were obtained on a Hitachi F-4500 fluorescence spectrophotometer adapted to a right-angle configuration at room temperature. The emission lifetimes of samples were determined by single-photon counting on a FL920 spectrometer. The fluorescence quantum yields were measured relative to rhodamin 6G in methanol ( $\lambda_{\text{ex}} = 488 \text{ nm}$ ,  $\Phi_{\text{F}} = 0.86$ ) at room temperature and corrected for changes in the refractive index.<sup>1</sup> All 1,8-naphthyridine derivatives, 2,4-dimethyl-7-amino-1,8-naphthyridine, 2-methyl-7-amino-1,8-naphthyridine, 2-chloro-7-amino-1,8-naphthyridine, and 2-hydroxyl-7-amino-1,8-naphthyridine were prepared according to reported methods.<sup>2-5</sup>

### X-ray crystallography

X-ray diffraction measurements for compounds **1**, **4**, and **6–9** were carried out on a Bruker SMART or Rigaku SATURN diffractometer using a graphite monochromator with Mo-K $\alpha$  radiation ( $\lambda = 0.071073 \text{ nm}$ ) at 113 K or room temperature. The structures of the compounds were solved by direct methods using SHELXL-97. All non-hydrogen atoms were refined anisotropically by the full-matrix least-squares method using  $F^2$  data.<sup>6,7</sup>

### Theoretical calculations

All optimizations were carried out in CH<sub>2</sub>Cl<sub>2</sub> solution with the Gaussian 03 program package at the SCRF-B3LYP/6-311++G(d,p) level employing the PCM/Bader model. TD-DFT at the SCRF-TD-DFT B3LYP/6-311++G(d,p) level was carried out in CH<sub>2</sub>Cl<sub>2</sub> solution to predict and verify the absorption spectra of various species.<sup>8-11</sup>

### References

- 1 J. Olmsted, *J. Phys. Chem.*, 1979, **83**, 2581–2584.
- 2 H. F. J. Li, W. F. Fu, L. Li, X. Gan, W. H. Mu, W. Q. Chen, X. M. Duan and H. B. Song, *Org. Lett.*, 2010, **12**, 2924–2927.
- 3 L. Quan, Y. Chen, X. J. Lv and W. F. Fu, *Chem. Eur. J.*, 2012, **18**, 14599–14604.
- 4 Y. Y. Wu, Y. Chen, G. Z. Gou, W. H. Mu, X. J. Lv, M. L. Du and W. F. Fu, *Org. Lett.*, 2012, **14**, 5226–5229.
- 5 Y. Y. Wu, Y. Chen, W. H. Mu, X. J. Lv and W. F. Fu, *J. Photochem. Photobio. A Chemistry*, 2013, **272**, 73–79.
- 6 W. F. Fu, L. F. Jia, W. H. Mu, X. Gan, J. B. Zhang, P. H. Liu, Q. Y. Cao, G. J. Zhang, L. Quan, X. J. Lv and Q. Q. Xu, *Inorg. Chem.*, 2010, **49**, 4524–4533.
- 7 G. M. Sheldrick, *SHELXS-97, Program for solution of crystal structures*, University of Göttingen, Germany, 1997.
- 8 G. M. Sheldrick, *SHELXL-97 Program for the Refinement of Crystal Structures*, University of Göttingen, Germany, 1997.
- 9 M. J. Frisch, G. W. Trucks, H. B. Schlegel, G. E. Scuseria, M. A. Robb, J. R. Cheeseman, J. A. Montgomery, Jr., T. Vreven, K. N. Kudin, J. C. Burant, J. M. Millam, S. S. Iyengar, J. Tomasi, V. Barone, B. Mennucci, M. Cossi, G. Scalmani, N. Rega, G. A. Petersson, H. Nakatsuji, M. Hada, M. Ehara, K. Toyota, R. Fukuda, J. Hasegawa, M. Ishida, T. Nakajima, Y. Honda, O. Kitao, H. Nakai, M. Klene, X. Li, J. E. Knox, H. P. Hratchian, J. B. Cross, V. Bakken, C. Adamo, J. Jaramillo, R. Gomperts, R. E. Stratmann, O. Yazyev, A. J. Austin, R. Cammi, C. Pomelli, J. Ochterski, P. Y. Ayala, K. Morokuma, G. A. Voth, P. Salvador, J. J. Dannenberg, V. G. Zakrzewski, S. Dapprich, A. D. Daniels, M. C. Strain, O. Farkas, D. K. Malick, A. D. Rabuck, K. Raghavachari, J. B. Foresman, J. V. Ortiz, Q. Cui, A. G. Baboul, S. Clifford, J. Cioslowski, B. B. Stefanov, G. Liu, A. Liashenko, P. Piskorz, I. Komaromi, R. L. Martin, D. J. Fox, T. Keith, M. A. Al-Laham, C. Y. Peng, A. Nanayakkara, M. Challacombe, P. M. W. Gill, B. G. Johnson, W. Chen, M. W. Wong, C. Gonzalez and J. A. Pople, *GAUSSIAN 03 (Revision C.02)*, Gaussian, Inc., Wallingford, CT, 2004.

- 10 A. D. Becke, *J. Chem. Phys.*, 1993, **98**, 5648–5652.
- 11 C. Lee, W. Yang and R. G. Parr, *Phys. Rev. B*, 1988, **37**, 785–789.
- 12 M. P. Andersson and P. Uvdal, *J. Phys. Chem. A*, 2005, **109**, 2937–2941.

**Table S1. X-ray crystallographic data for complexes 1, 4, 6–9.**

| Compounds                                                   | <b>1</b>                                                         | <b>4</b>                                                                      | <b>6·0.5H<sub>2</sub>O</b>                                                      | <b>7·1/3CH<sub>2</sub>Cl<sub>2</sub></b>                         | <b>8</b>                                                                        | <b>9</b>                                                                      |
|-------------------------------------------------------------|------------------------------------------------------------------|-------------------------------------------------------------------------------|---------------------------------------------------------------------------------|------------------------------------------------------------------|---------------------------------------------------------------------------------|-------------------------------------------------------------------------------|
| formula                                                     | C <sub>12</sub> H <sub>12</sub> BF <sub>2</sub> N <sub>3</sub> O | C <sub>10</sub> H <sub>20</sub> BF <sub>2</sub> N <sub>3</sub> O <sub>2</sub> | C <sub>16</sub> H <sub>17</sub> BF <sub>2</sub> N <sub>3</sub> O <sub>3.5</sub> | C <sub>12</sub> H <sub>13</sub> BF <sub>2</sub> N <sub>3</sub> O | C <sub>14</sub> H <sub>13</sub> BClF <sub>2</sub> N <sub>3</sub> O <sub>2</sub> | C <sub>26</sub> H <sub>25</sub> BF <sub>2</sub> N <sub>6</sub> O <sub>2</sub> |
| formula weight                                              | 263.06                                                           | 263.10                                                                        | 356.14                                                                          | 292.37                                                           | 339.53                                                                          | 502.33                                                                        |
| <i>T</i> [K]                                                | 113(2)                                                           | 113(2)                                                                        | 113(2)                                                                          | 113(2)                                                           | 293(2)                                                                          | 113(2)                                                                        |
| crystal system                                              | triclinic                                                        | monoclinic                                                                    | monoclinic                                                                      | triclinic                                                        | triclinic                                                                       | triclinic                                                                     |
| space group                                                 | P-1                                                              | P1 21/c1                                                                      | P2(1)/c                                                                         | P-1                                                              | P-1                                                                             | P-1                                                                           |
| crystal size [mm]                                           | 0.32×0.24×0.22                                                   | 0.24×0.06×0.05                                                                | 0.22×0.20×0.12                                                                  | 0.20×0.18×0.10                                                   | 0.20×0.15×0.10                                                                  | 0.22×0.20×0.18                                                                |
| <i>a</i> [Å]                                                | 7.2978(8)                                                        | 4.6470(8)                                                                     | 20.167(6)                                                                       | 11.461(3)                                                        | 7.645(2)                                                                        | 8.506(1)                                                                      |
| <i>b</i> [Å]                                                | 8.114(1)                                                         | 19.0559(3)                                                                    | 17.717(5)                                                                       | 12.130(3)                                                        | 12.310(3)                                                                       | 8.810(1)                                                                      |
| <i>c</i> [Å]                                                | 10.499(1)                                                        | 11.323(2)                                                                     | 9.387(3)                                                                        | 14.451(4)                                                        | 16.339(3)                                                                       | 17.414(2)                                                                     |
| $\alpha$ [°]                                                | 93.34(2)                                                         | 90                                                                            | 90                                                                              | 83.107(7)                                                        | 94.37(3)                                                                        | 96.487(5)                                                                     |
| $\beta$ [°]                                                 | 107.60(2)                                                        | 96.138(8)                                                                     | 99.038                                                                          | 82.118(7)                                                        | 99.76(3)                                                                        | 103.927(3)                                                                    |
| $\gamma$ [°]                                                | 94.49(3)                                                         | 90                                                                            | 90                                                                              | 73.049(6)                                                        | 95.76(3)                                                                        | 105.669(4)                                                                    |
| <i>V</i> [Å <sup>3</sup> ]                                  | 588.57(12)                                                       | 996.9(3)                                                                      | 3312,2(17)                                                                      | 1896.9(8)                                                        | 1500.9(5)                                                                       | 1197.2(2)                                                                     |
| <i>Z</i>                                                    | 2                                                                | 4                                                                             | 8                                                                               | 2                                                                | 2                                                                               | 2                                                                             |
| <i>D<sub>c</sub></i> /g cm <sup>-3</sup>                    | 1.484                                                            | 1.753                                                                         | 1.428                                                                           | 1.536                                                            | 1.503                                                                           | 1.393                                                                         |
| $\mu$ [mm <sup>-1</sup> ]                                   | 0.118                                                            | 0.145                                                                         | 0.115                                                                           | 0.254                                                            | 0.288                                                                           | 0.101                                                                         |
| $2\theta_{\max}$ [°]                                        | 60.06                                                            | 55.78                                                                         | 55.76                                                                           | 50.04                                                            | 52.00                                                                           | 55.86                                                                         |
| unique reflections                                          | 3324                                                             | 2350                                                                          | 7848                                                                            | 6688                                                             | 5758                                                                            | 5705                                                                          |
| parameters                                                  | 175                                                              | 168                                                                           | 481                                                                             | 542                                                              | 415                                                                             | 341                                                                           |
| <i>R</i> <sub>int</sub>                                     | 0.0504                                                           | 0.0426                                                                        | 0.0573                                                                          | 0.0413                                                           | 0.0361                                                                          | 0.0412                                                                        |
| goodness of fit                                             | 1.041                                                            | 1.007                                                                         | 1.038                                                                           | 1.039                                                            | 1.122                                                                           | 0.909                                                                         |
| <i>R</i> 1, <i>wR</i> 2[ <i>I</i> >2 $\sigma$ ( <i>I</i> )] | 0.0476, 0.1337                                                   | 0.0368, 0.0830                                                                | 0.0471, 0.0980                                                                  | 0.0640, 0.2047                                                   | 0.0524, 0.1678                                                                  | 0.0371, 0.0939                                                                |
| <i>R</i> 1, <i>wR</i> 2[all data]                           | 0.0503, 0.1369                                                   | 0.0537, 0.0910                                                                | 0.0676, 0.1067                                                                  | 0.0846, 0.2227                                                   | 0.0662, 0.1865                                                                  | 0.0582, 0.1001                                                                |
| max, min peaks (e Å <sup>-3</sup> )                         | 0.463, -0.320                                                    | 0.283, -0.235                                                                 | 0.268, -0.258                                                                   | 1.960, -1.578                                                    | 0.588, -0.490                                                                   | 0.181, -0.315                                                                 |

$$R1 = \frac{\sum |F_o|}{\sum |F_c|} - \frac{|F_c|}{\sum |F_o|}, \quad wR2 = \frac{\{\sum [w(F_o^2 - F_c^2)^2]\}^{1/2}}{\sum [w(F_o^2)^2]^{1/2}}$$

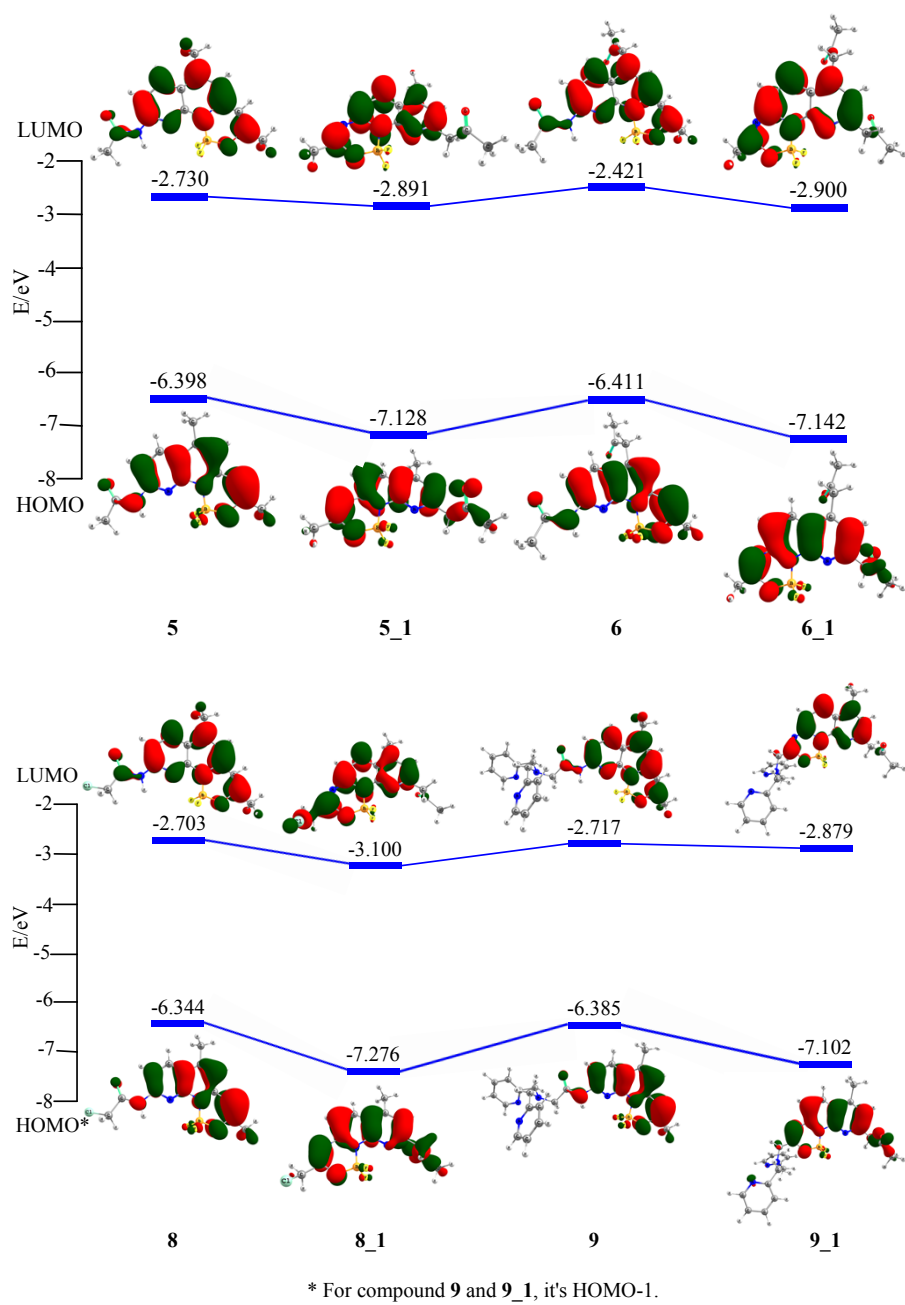

**Figure S1.** Molecular orbital energy diagrams of 5, 6, 8 and 9 and their corresponding compounds.

**Table S2.** Optical transitions with oscillator strength ( $f$ ) calculated by the TD-DFT (SCRFP(PCM/Bader)-B3LYP/6-311++G(d,p)) level in CH<sub>2</sub>Cl<sub>2</sub> solution.

| cpd.       | electronic transitions          | energy (eV) | $\lambda_{ab}/nm(cal.)$ | $\lambda_{ab}/nm(exp.)$ | $f$    | composition             |
|------------|---------------------------------|-------------|-------------------------|-------------------------|--------|-------------------------|
| <b>1</b>   | S <sub>0</sub> -S <sub>1</sub>  | 3.77        | 329                     | 344, 361                | 0.47   | HOMO to LUMO (0.69)     |
|            | S <sub>0</sub> -S <sub>6</sub>  | 5.05        | 245                     |                         | 0.35   | HOMO to LUMO+1 (0.65)   |
| <b>2</b>   | S <sub>0</sub> -S <sub>1</sub>  | 3.79        | 327                     | 343, 360                | 0.48   | HOMO to LUMO (0.70)     |
|            | S <sub>0</sub> -S <sub>6</sub>  | 5.10        | 243                     |                         | 0.28   | HOMO to LUMO+1 (0.63)   |
| <b>3</b>   | S <sub>0</sub> -S <sub>1</sub>  | 3.73        | 332                     | 345, 362                | 0.50   | HOMO to LUMO (0.69)     |
|            | S <sub>0</sub> -S <sub>6</sub>  | 5.18        | 239                     |                         | 0.42   | HOMO to LUMO+1 (0.42)   |
| <b>4</b>   | S <sub>0</sub> -S <sub>1</sub>  | 3.70        | 335                     | 365, 383                | 0.52   | HOMO to LUMO (0.70)     |
| <b>5</b>   | S <sub>0</sub> -S <sub>1</sub>  | 3.26        | 380                     | 390, 410                | 0.60   | HOMO to LUMO (0.70)     |
|            | S <sub>0</sub> -S <sub>6</sub>  | 4.70        | 263                     | 263                     | 0.36   | HOMO-3 to LUMO (0.54)   |
| <b>5_1</b> | S <sub>0</sub> -S <sub>1</sub>  | 3.73        | 332                     |                         | 0.43   | HOMO to LUMO (0.68)     |
|            | S <sub>0</sub> -S <sub>8</sub>  | 5.06        | 245                     |                         | 0.34   | HOMO to LUMO+1 (0.56)   |
| <b>6</b>   | S <sub>0</sub> -S <sub>1</sub>  | 3.22        | 385                     | 392, 412                | 0.58   | HOMO to LUMO (0.70)     |
|            | S <sub>0</sub> -S <sub>12</sub> | 5.2         | 238                     | 254                     | 0.56   | HOMO-1 to LUMO+1 (0.55) |
| <b>6_1</b> | S <sub>0</sub> -S <sub>1</sub>  | 3.74        | 331                     |                         | 0.45   | HOMO to LUMO (0.68)     |
|            | S <sub>0</sub> -S <sub>10</sub> | 5.04        | 246                     |                         | 0.38   | HOMO to LUMO+1 (0.62)   |
| <b>7</b>   | S <sub>0</sub> -S <sub>1</sub>  | 3.25        | 381                     | 390, 412                | 0.56   | HOMO to LUMO (0.70)     |
|            | S <sub>0</sub> -S <sub>6</sub>  | 4.90        | 253                     | 256                     | 0.38   | HOMO-3 to LUMO (0.50)   |
| <b>8</b>   | S <sub>0</sub> -S <sub>1</sub>  | 3.22        | 385                     | 391, 412                | 0.58   | HOMO to LUMO (0.70)     |
|            | S <sub>0</sub> -S <sub>8</sub>  | 5.15        | 241                     | 268                     | 0.43   | HOMO to LUMO+3 (0.51)   |
| <b>8_1</b> | S <sub>0</sub> -S <sub>1</sub>  | 3.66        | 338                     |                         | 0.36   | HOMO to LUMO (0.66)     |
|            | S <sub>0</sub> -S <sub>10</sub> | 4.96        | 250                     |                         | 0.31   | HOMO to LUMO+1 (0.52)   |
| <b>9</b>   | S <sub>0</sub> -S <sub>1</sub>  | 2.95        | 420                     | 392, 413                | 0.0001 | HOMO to LUMO (0.70)     |
|            | S <sub>0</sub> -S <sub>2</sub>  | 3.26        | 381                     | 261                     | 0.64   | HOMO-1 to LUMO (0.69)   |
| <b>9_1</b> | S <sub>0</sub> -S <sub>1</sub>  | 2.72        | 456                     |                         | 0.0093 | HOMO to LUMO (0.70)     |
|            | S <sub>0</sub> -S <sub>2</sub>  | 3.71        | 333                     |                         | 0.5269 | HOMO-1 to LUMO (0.69)   |

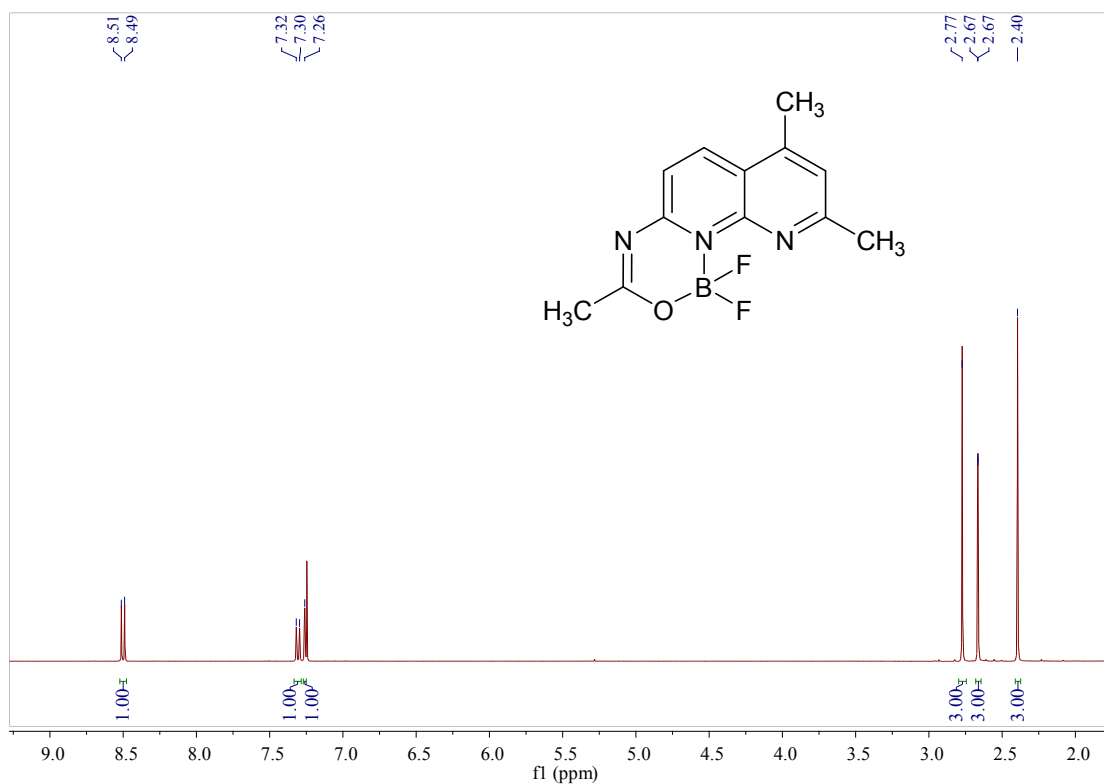

<sup>1</sup>H NMR spectra of **1** in CDCl<sub>3</sub>

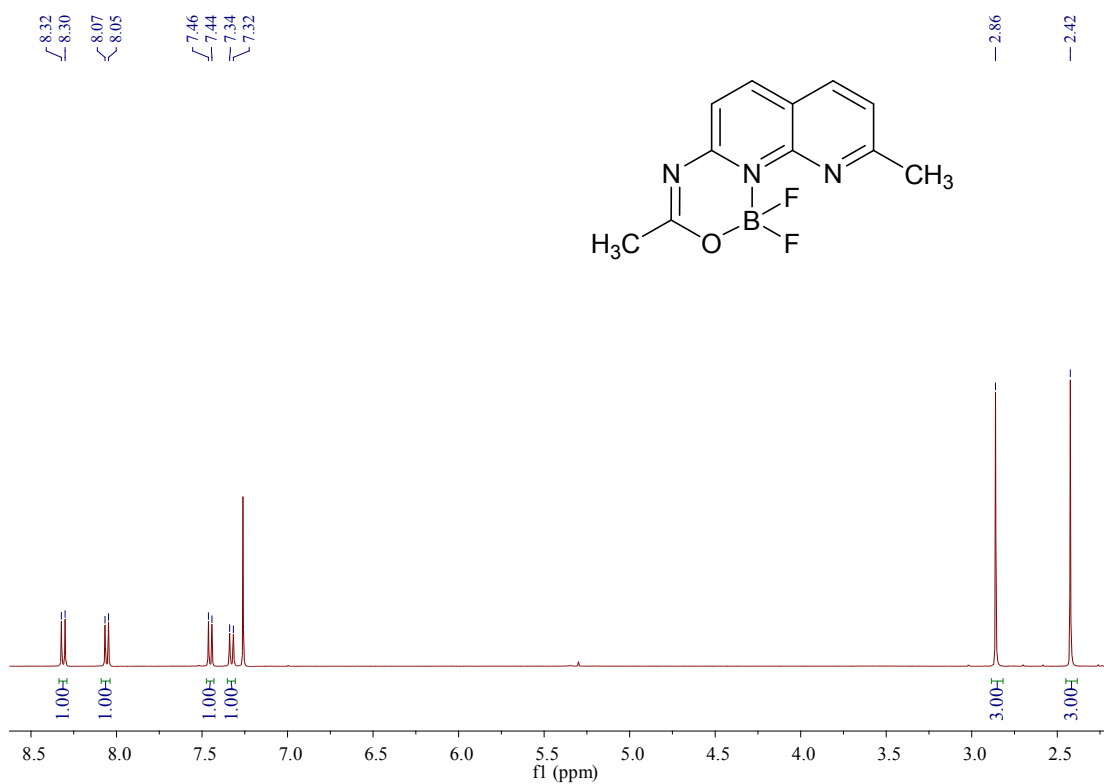

<sup>1</sup>H NMR spectra of **2** in CDCl<sub>3</sub>

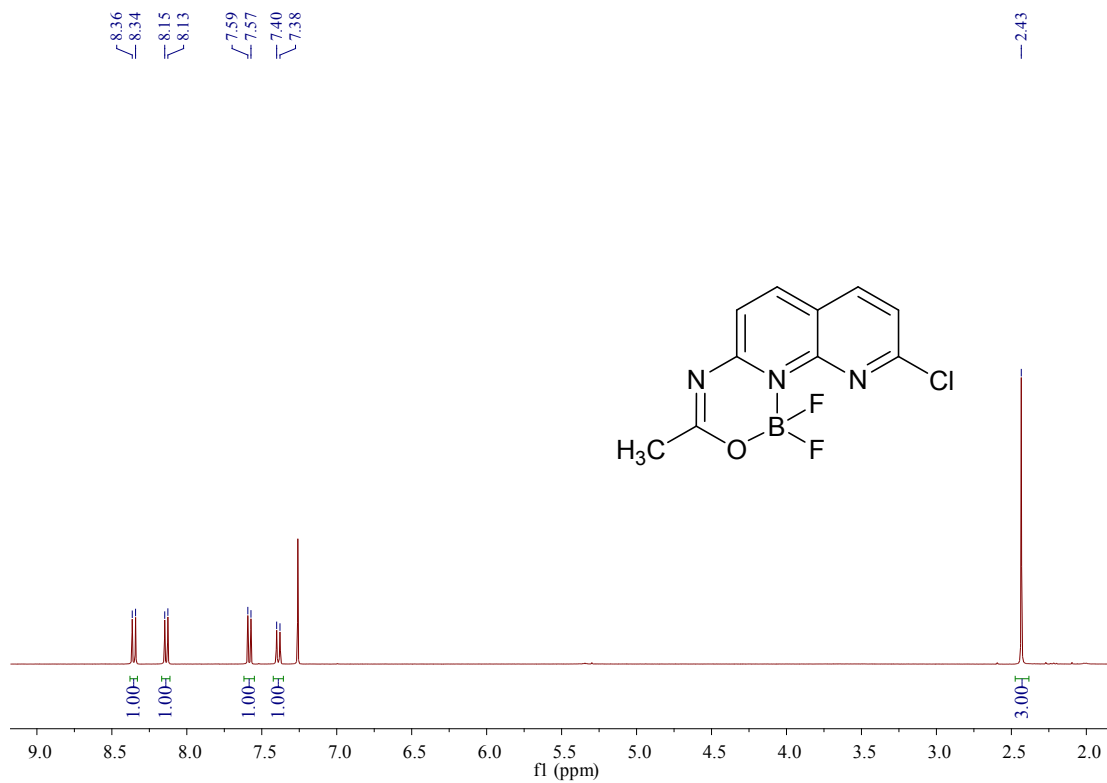

$^1\text{H}$  NMR spectra of **3** in  $\text{CDCl}_3$

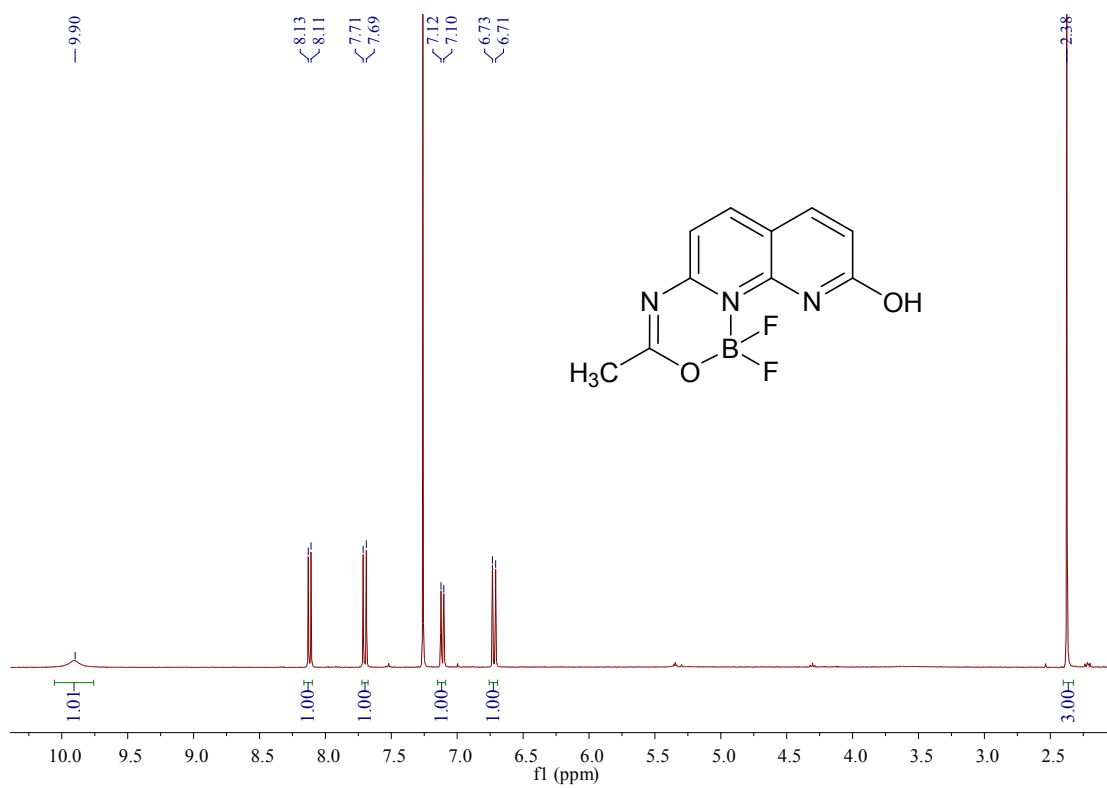

$^1\text{H}$  NMR spectra of **4** in  $\text{CDCl}_3$



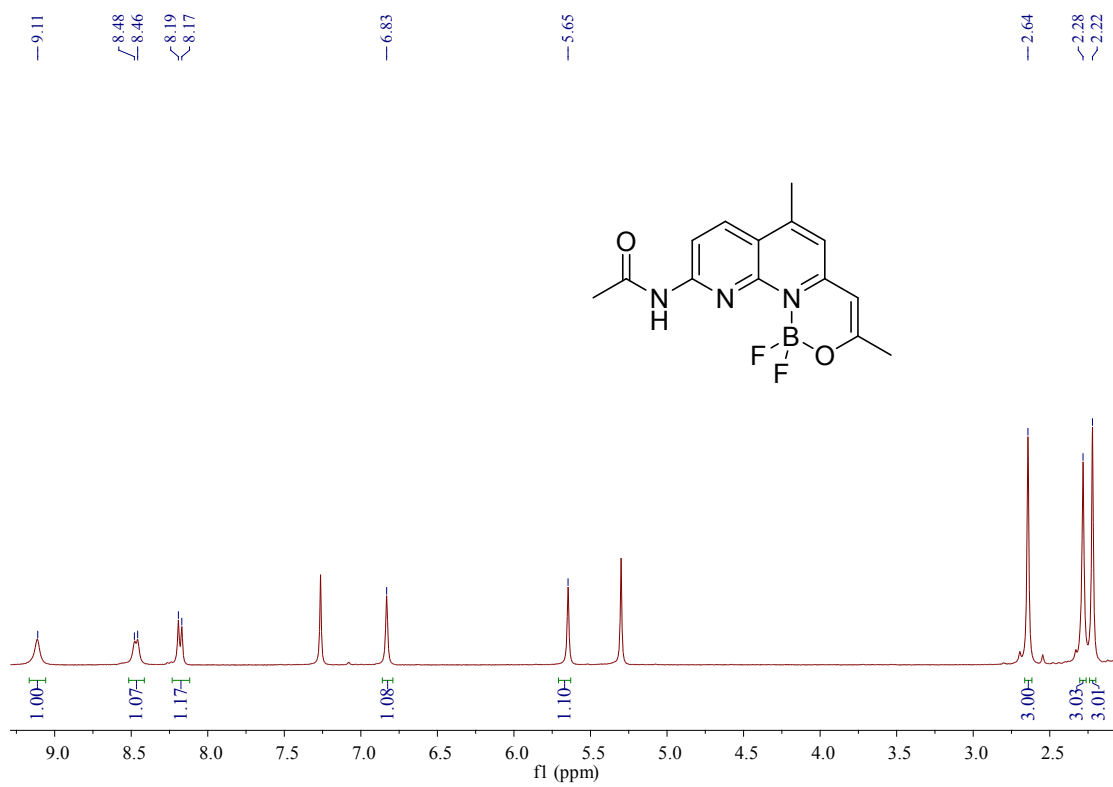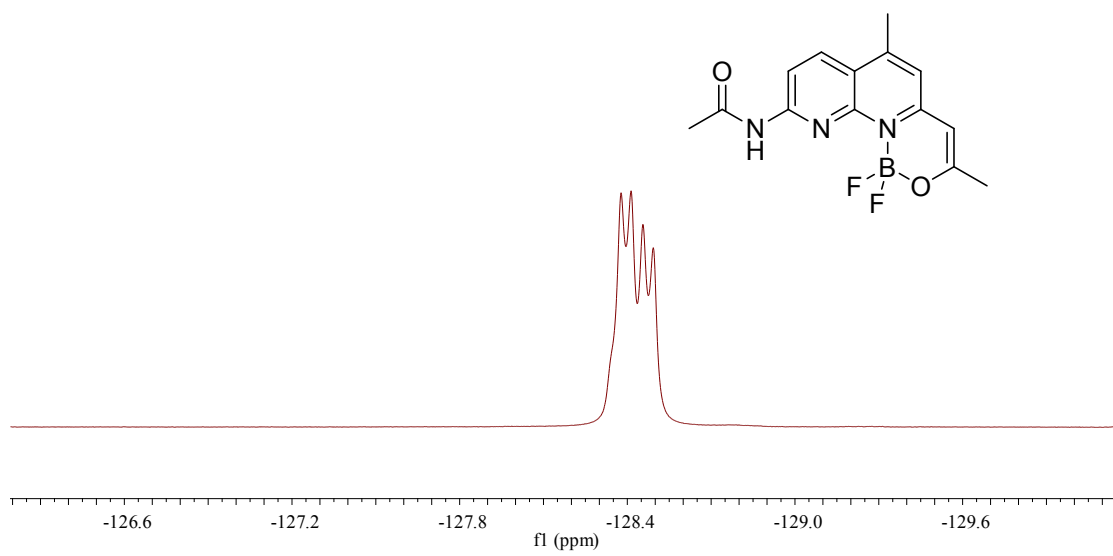

$^1\text{H}$ ,  $^{19}\text{F}$  NMR spectra of **5** in  $\text{CDCl}_3$

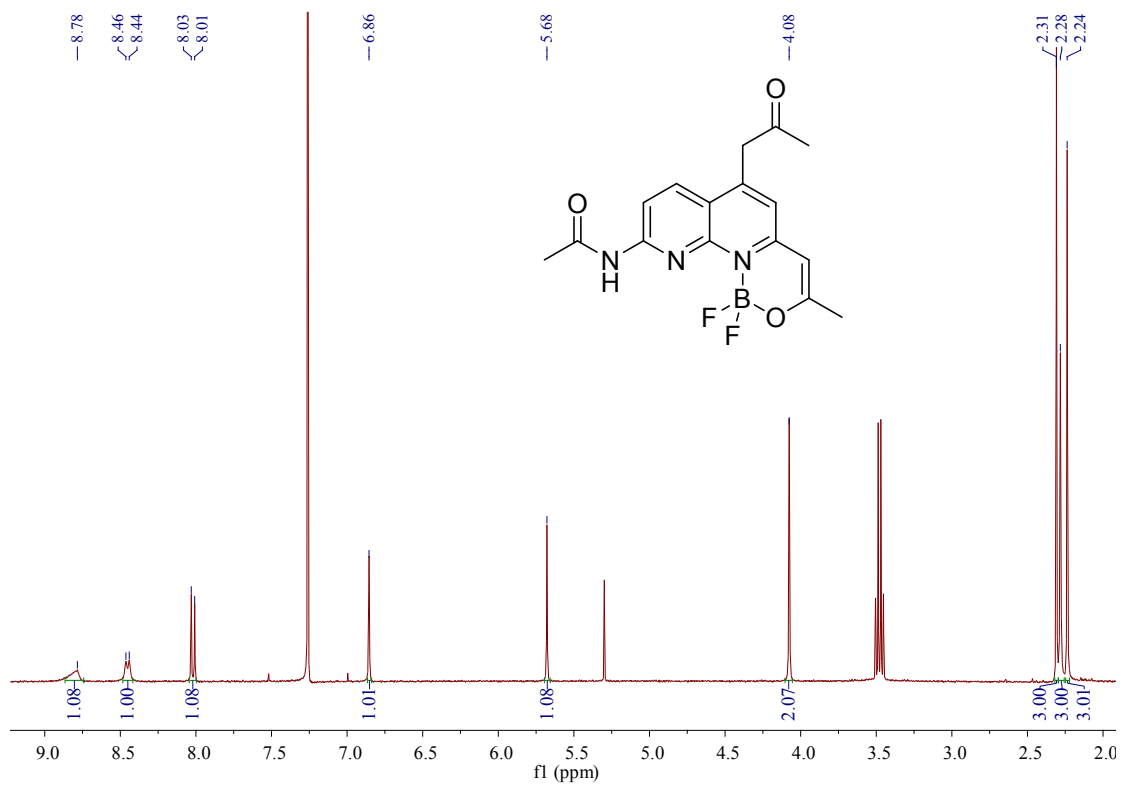

$^1\text{H}$  NMR spectra of **6** in  $\text{CDCl}_3$

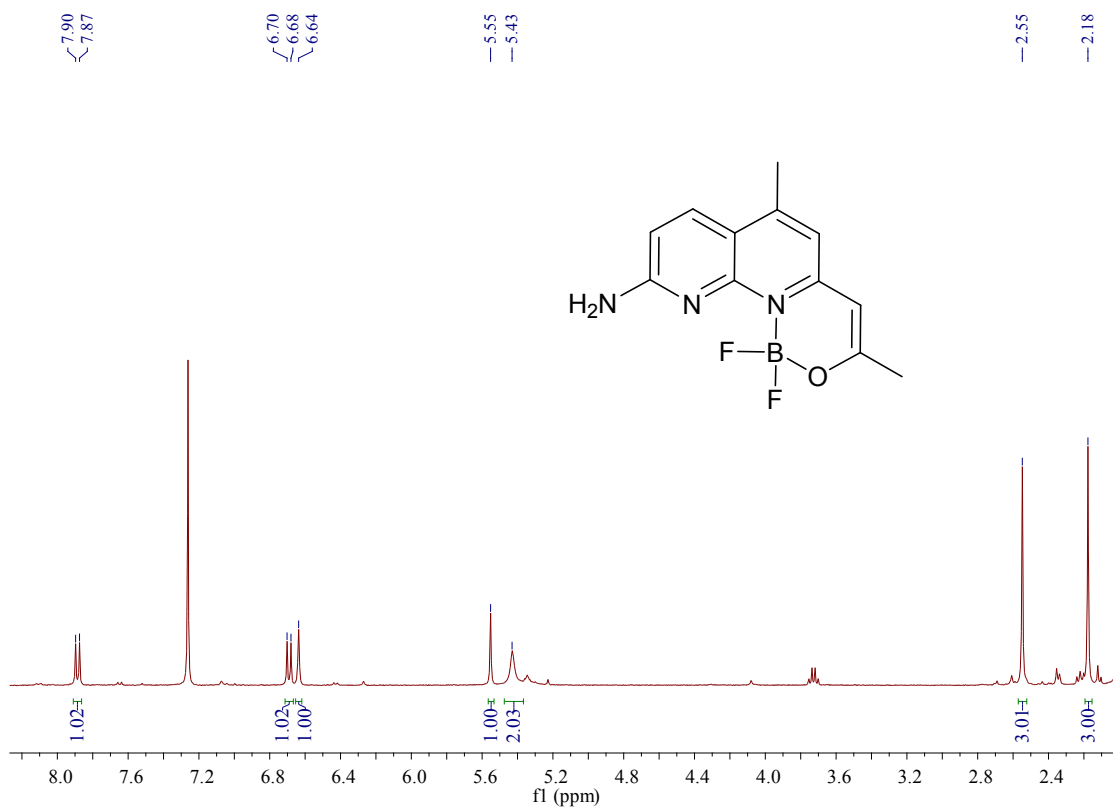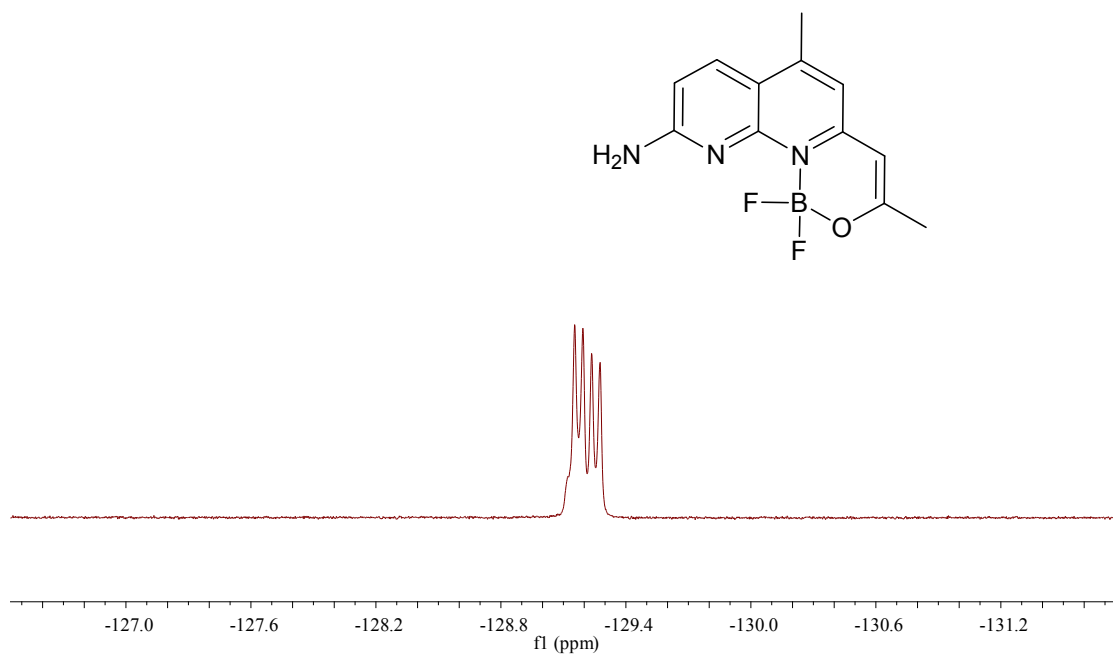

<sup>1</sup>H, <sup>19</sup>F NMR spectra of 7 in CDCl<sub>3</sub>

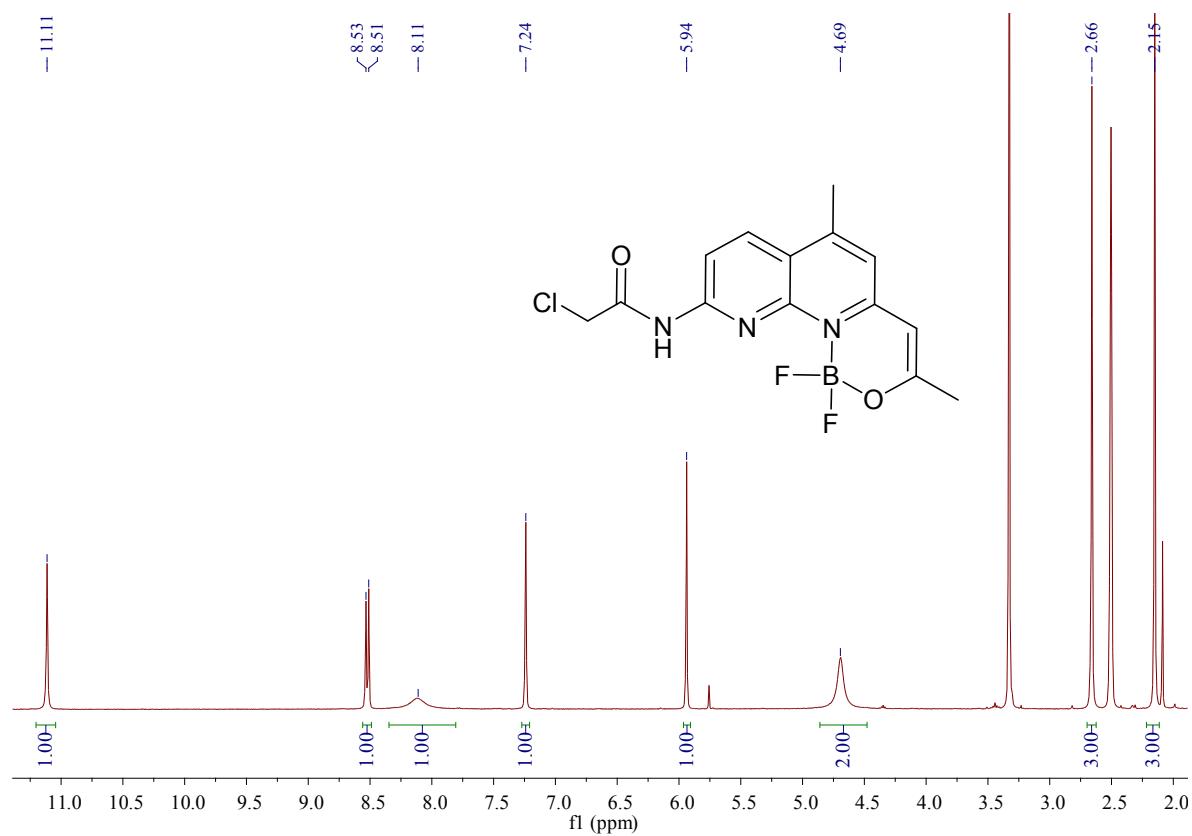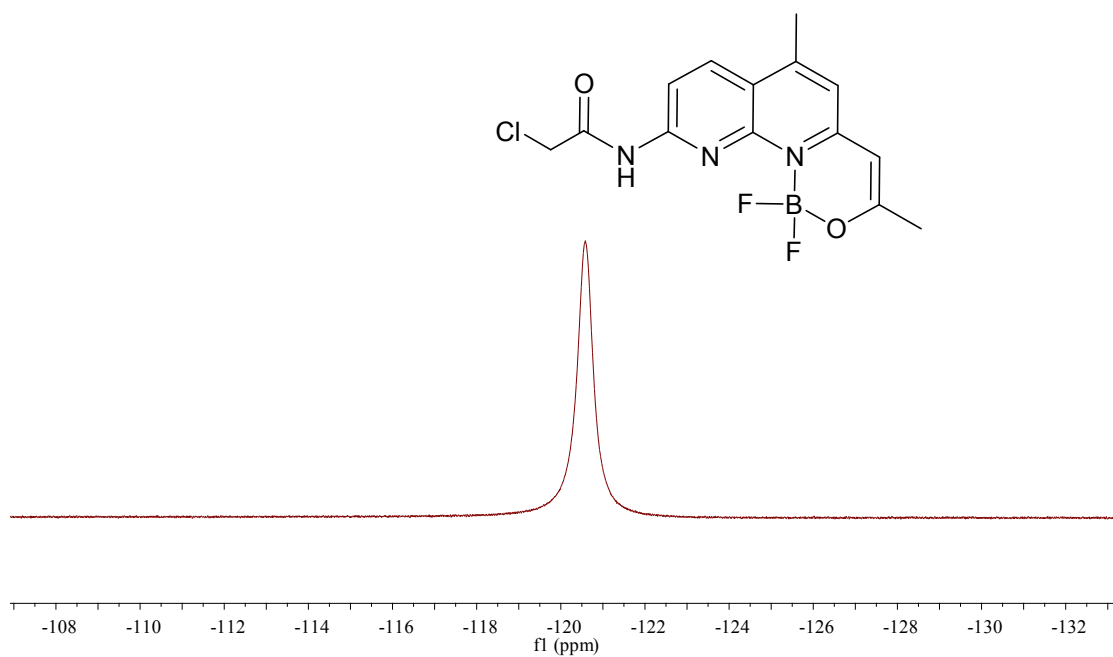

<sup>1</sup>H, <sup>19</sup>F NMR spectra of **8** in DMSO-d<sub>6</sub>

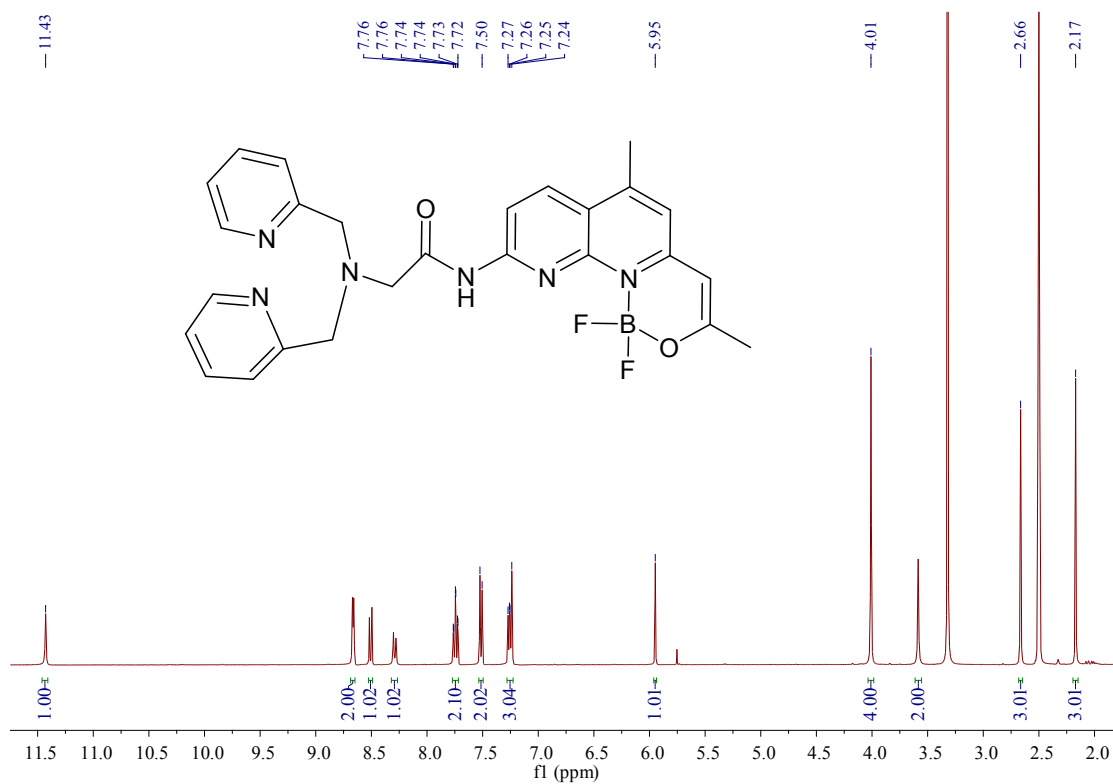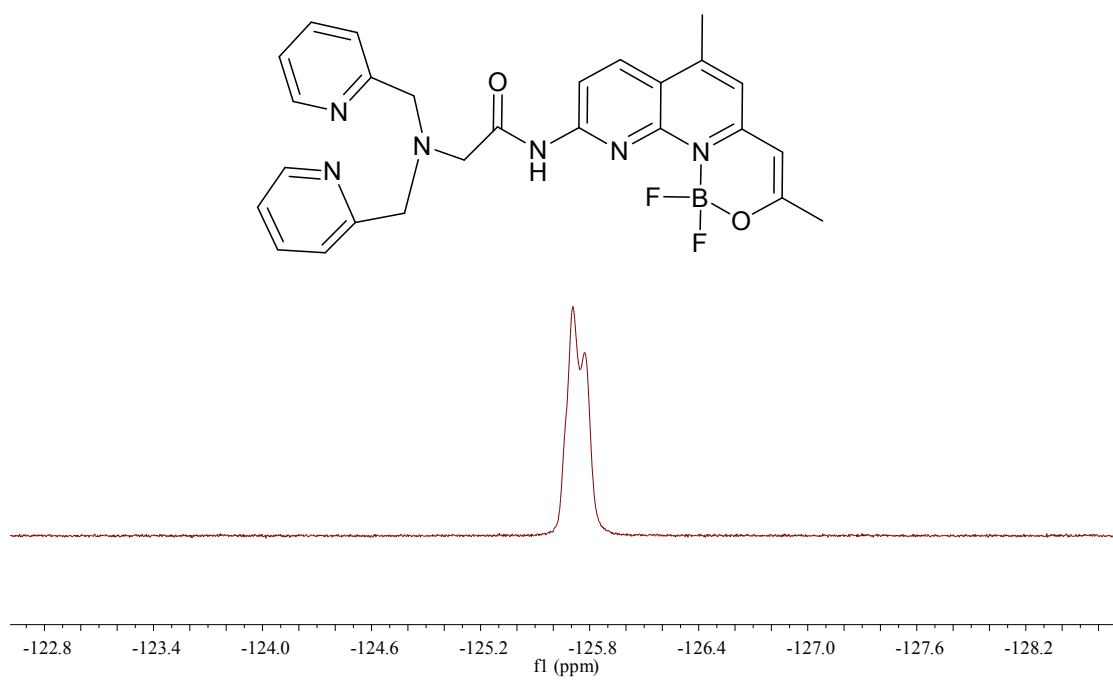

<sup>1</sup>H, <sup>19</sup>F NMR spectra of 9 in DMSO-d<sub>6</sub>
